# Supplementary material
Source: Springer Nature journal article supplement (https://www.springermedizin.de/resource/supplementary/12872_2006_138_MOESM5_ESM.pdf/9431100)

**A**

III-301MN, 21 mo

III-1803MA, 7 mo

III-302MA, 21 mo

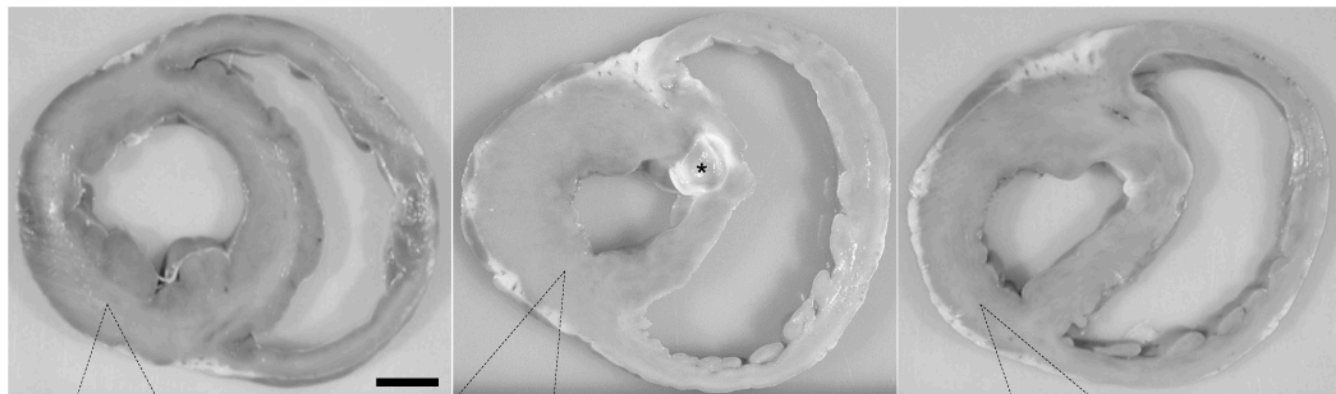**B**

Normal

CXMD<sub>J</sub>III-301MN  
21 moIII-1803MA  
7 moIII-D55MA  
9 moIII-D02MA,  
15 moIII-302MA  
21 mo

H&amp;E

MT

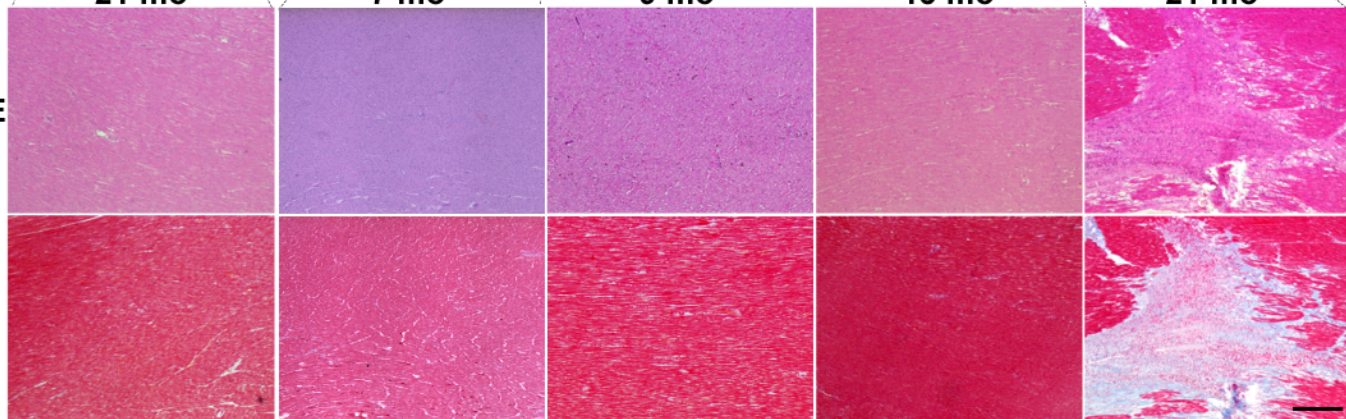

Supplement: MOESM5 [file 9431100]
